# Supplementary material for: Prevalence of Human Papillomavirus in Different Mucous Membranes in HIV Concordant Couples in Rwanda
Source: MDPI journal article supplement (doi:10.3390/v15041005), 2023-04-19
Supplement: s1 [file s1]

**Table S1.** Primers and probes for real-time PCR.

| HPV Type    | Mix | Oligo Type | Oligo Sequence                           |
|-------------|-----|------------|------------------------------------------|
| 16          | 1   | F          | TTGCAGATCATCAAGAACACGTAGA                |
|             |     | R          | CAGTAGAGATCAGTTGTCTCTGGTTGC              |
|             |     | P          | 5'-FAM-AATCATGCATGGAGATACACCTACATTGCATGA |
| 6           | 2   | F          | RCGGTTYATAAAGCTAAATTGTACGT               |
|             |     | R          | AGGGTAACATGTCTTCCATGCA                   |
|             |     | P          | 5'-VIC-AAGGGTCGCTGCCTACACTGCTGG          |
| 58          | 2   | F          | GGCATGTGGATTAAACAAAAGGT                  |
|             |     | R          | TCTCATGGCGTTGTTACAGGTTAC                 |
|             |     | P          | 5'-FAM-CACTGCACAGCGCCCTGTCCAA            |
| 11          | 3   | F          | GCTTCATAAAACTAAATAACCAGTGGA              |
|             |     | R          | GTCAGGAGGCTGCAGGTCTAGTA                  |
|             |     | P          | 5'-FAM-TCCAGCAGTGTAAGCAACGACCCTTCC       |
| 18          | 3   | F          | AGAGGCCAGTGCCATTTCGT                     |
|             |     | R          | GGTCTCTGCGTCGTTGGAGT                     |
|             |     | P          | 5'-VIC-TCCTGTCGTGCTCGGTTGCAGC*           |
| 31          | 4   | F          | ATTCCACAACATAGGAGGAAGGTG                 |
|             |     | R          | CACTTGGGTTTCAGTACGAGGTCT                 |
|             |     | P          | 5'-VIC-CTCCAACATGCTATGCAACGTCCTGTC       |
| 51          | 4   | F          | AAAGCAAAAATTGGTGGACGA                    |
|             |     | R          | TGCCAGCAATTAGCGCATT                      |
|             |     | P          | 5'-FAM-CATGAAATAGCGGGACGTTGGACG          |
| 33          | 5   | F          | ATATTTCTGGGTCGTTGGGCA                    |
|             |     | R          | ACGTCACAGTGCAGTTTCTCTACGT                |
|             |     | P          | 5'-VIC-GGACCTCCAACACGCCGCACA*            |
| 35          | 5   | F          | TCGGTGTATGTCCTGTTGGAAAC                  |
|             |     | R          | CATAGTCTTGCAATGTAGTTATTTCTCCA            |
|             |     | P          | 5'-FAM-TGCATGATTACACCTCGGTTTCTCTACGTG    |
| 39          | 6   | F          | GCAGGAAGCTATACAGGACAGTGTC                |
|             |     | R          | CTTGGGTTTCTCTTCGTGTTAGTCT                |
|             |     | P          | 5'-FAM-CCCGTTTTGTGGTCCAGCACCG*           |
| 52          | 6   | F          | GACATGTTAATGCAAACAAGCGAT                 |
|             |     | R          | CATGACGTTACACTTGGGTCACA                  |
|             |     | P          | 5'-VIC-TGTTTCAGAGTGTTGGAGACCCCGACC       |
| 45          | 7   | F          | GGACAGTACCGAGGGCAGTGTA                   |
|             |     | R          | TCCCTACGTCTGCGAAGTCTTTC                  |
|             |     | P          | 5'-VIC-CATGTTGTGACCAGGCACGGCA            |
| 56          | 7   | F          | GGCATGTGGATTAAACAAAAGGT                  |
|             |     | R          | TCTCATGGCGTTGTTACAGGTTAC                 |
|             |     | P          | 5'-FAM-CACTGCACAGCGCCCTGTCCAA            |
| 59          | 8   | F          | TGTATGGAGAAACATTAGAGGCTGAA               |
|             |     | R          | TGGACATAGAGGTTTTAGGCATCTATAA             |
|             |     | P          | 5'-FAM-AGACACCGTTACATGAGCTGCTGATACGC     |
| Beta-globin | 8   | F          | GCTCATGGCAAGAAAGTGCTC                    |
|             |     | R          | GCAAAGGTGCCCTTGAGGT                      |
|             |     | P          | 5'-VIC-AGTGATGGCCTGGCTCACCTGGAC          |

F=forward primer; R=reverse primer; P=probe; \*, antisense.

**Table S2.** HPV infections in mucous membranes of HIV+ couples.

| Couple number | Patient no | Oral HPV |      | Oropharynx HPV |       | Anal HPV |      | Genital HPV |           |           |       |
|---------------|------------|----------|------|----------------|-------|----------|------|-------------|-----------|-----------|-------|
|               |            | Female   | Male | Female         | Male  | Female   | Male | Cervix      | Vagina-sc | Vagina-pc | Penis |
| 1             | 1-2        | 0        | 0    | 0              | 59    | 0        | 0    | 0           | 0         | 0         | 59    |
| 2             | 3-4        | 0        | 0    | 0              | 0     | 0        | 0    | 0           | 52        | 52        | 0     |
| 3             | 5-6        | 0        | 0    | 0              | 59    | 0        | 0    | 0           | 0         | 0         | 18    |
| 4             | 7-8        | 0        | 0    | 0              | 0     | 0        | 0    | 0           | 0         | 0         | 0     |
| 5             | 9-10       | 0        | 0    | 0              | 0     | 0        | 0    | 0           | 0         | 51        | 0     |
| 6             | 11-12      | 0        | 0    | 0              | 31/51 | 0        | 0    | 0           | 0         | 0         | 0     |
| 7             | 13-14      | 0        | 0    | 0              | 0     | 0        | 0    | 0           | 0         | 0         | 0     |
| 8             | 15-16      | 0        | 0    | 0              | 0     | 0        | 0    | 0           | 0         | 0         | 0     |
| 9             | 17-18      | 0        | 0    | 0              | 0     | 0        | 0    | 0           | 0         | 0         | 0     |
| 10            | 19-20      | 0        | 0    | 0              | 0     | 0        | 11   | 0           | 0         | 0         | 56    |
| 11            | 21-22      | 0        | 0    | 0              | 0     | 0        | 0    | 0           | 0         | 0         | 0     |
| 12            | 23-24      | 0        | 0    | 0              | 0     | 0        | 0    | 0           | 0         | 0         | 0     |
| 13            | 25-26      | 0        | 0    | 0              | 0     | 0        | 0    | 0           | 0         | 0         | 0     |
| 14            | 27-28      | 16       | 0    | 0              | 0     | 18       | 0    | 0           | 18        | 0         | 0     |
| 15            | 29-30      | 16       | 16   | 0              | 0     | 35       | 0    | 16          | 16        | 16        | 0     |
| 16            | 31-32      | 16       | 16   | 0              | 16    | 0        | 0    | 52          | 0         | 0         | 0     |
| 17            | 33-34      | 16       | 16   | 0              | 0     | 0        | 0    | 0           | 0         | 0         | 0     |
| 18            | 35-36      | 16       | 16   | 0              | 0     | 0        | 0    | 0           | 0         | 0         | 0     |
| 19            | 37-38      | 0        | 0    | 0              | 0     | 51       | 0    | 0           | 0         | 0         | 0     |
| 20            | 39-40      | 0        | 0    | 0              | 0     | 58       | 0    | 58          | 58        | 58        | 0     |
| 21            | 41-42      | 0        | 0    | 0              | 0     | 0        | 0    | 0           | 0         | 0         | 0     |
| 22            | 43-44      | 0        | 0    | 0              | 0     | 33       | 0    | 0           | 0         | 0         | 0     |
| 23            | 45-46      | 0        | 0    | 0              | 0     | 35       | 0    | 35          | 35        | 35        | 0     |
| 24            | 47-48      | 52       | 0    | 0              | 0     | 0        | 0    | 0           | 52        | 0         | 0     |
| 25            | 49-50      | 0        | 0    | 0              | 0     | 0        | 0    | 0           | 0         | 0         | 0     |
| 26            | 51-52      | 0        | 0    | 0              | 0     | 0        | 0    | 0           | 0         | 0         | 45/58 |
| 27            | 53-54      | 0        | 0    | 0              | 0     | 0        | 0    | 0           | 0         | 16        | 18    |
| 28            | 55-56      | 0        | 0    | 0              | 0     | 0        | 16   | 6/16        | 0         | 6/16      | 6/16  |
| 29            | 57-58      | 0        | 0    | 0              | 0     | 16       | 0    | 16          | 16        | 16        | 0     |
| 30            | 59-60      | 0        | 0    | 0              | 0     | 0        | 0    | 16          | 16        | 0         | 0     |
| 31            | 61-62      | 0        | 0    | 0              | 0     | 0        | 0    | 0           | 0         | 0         | 0     |
| 32            | 63-64      | 0        | 0    | 0              | 0     | 0        | 0    | 0           | 0         | 0         | 0     |
| 33            | 65-66      | 0        | 0    | 0              | 0     | 16       | 0    | 16          | 6/16      | 16        | 0     |

|           |            |   |                |   |                |             |   |               |               |               |                     |
|-----------|------------|---|----------------|---|----------------|-------------|---|---------------|---------------|---------------|---------------------|
| <b>34</b> | 67-68      | 0 | 0              | 0 | 0              | <b>6/39</b> | 0 | <b>6/39/5</b> | <b>6/39/5</b> | <b>6/39/5</b> | <b>39/45</b>        |
| <b>35</b> | 69-70      | 0 | 0              | 0 | 0              | 0           | 0 | 0             | 0             | 0             | 0                   |
| <b>36</b> | 71-72      | 0 | 0              | 0 | 0              | 0           | 0 | 0             | 0             | 0             | 45                  |
| <b>37</b> | 73-74      | 0 | 0              | 0 | 0              | 45          | 0 | 0             | <b>51/56</b>  | <b>51/56</b>  | 0                   |
| <b>38</b> | 75-76      | 0 | 0              | 0 | 0              | 0           | 0 | 0             | <b>16</b>     | <b>16</b>     | 0                   |
| <b>39</b> | 77-78      | 0 | 0              | 0 | 0              | 0           | 0 | 0             | 0             | 0             | 0                   |
| <b>40</b> | 79-80      | 0 | 0              | 0 | 0              | 0           | 0 | <b>11</b>     | 39            | 0             | <b>11</b>           |
| <b>41</b> | 81-82      | 0 | 0              | 0 | 0              | 0           | 0 | 0             | 0             | 0             | 0                   |
| <b>42</b> | 83-84      | 0 | 0              | 0 | 0              | 0           | 0 | 0             | 0             | 0             | 0                   |
| <b>43</b> | 85-86      | 0 | 0              | 0 | 0              | 0           | 0 | 0             | 0             | 0             | 0                   |
| <b>44</b> | 87-88      | 0 | 0              | 0 | 0              | 0           | 0 | 0             | 0             | 0             | 18                  |
| <b>45</b> | 89-90      | 0 | 0              | 0 | 0              | 0           | 0 | 0             | 0             | 0             | 18/59               |
| <b>46</b> | 91-92      | 0 | 0              | 0 | 0              | 0           | 0 | 0             | <b>52</b>     | <b>52</b>     | 0                   |
| <b>47</b> | 93-94      | 0 | 0              | 0 | 0              | <b>56</b>   | 0 | <b>56</b>     | <b>56</b>     | <b>56</b>     | 16/31/5<br>2        |
| <b>48</b> | 95-96      | 0 | <b>16/31/5</b> | 0 | <b>16/31/5</b> | <b>35</b>   | 0 | <b>35</b>     | <b>35</b>     | <b>35</b>     | <b>31/52/5</b><br>8 |
| <b>49</b> | 97-98      | 0 | 0              | 0 | 0              | 0           | 0 | 16            | 0             | 0             | 0                   |
| <b>50</b> | 99-<br>100 | 0 | 0              | 0 | 0              | 0           | 0 | 0             | 0             | 0             | 0                   |

**Table S3.** Vaginal and cervical HR-HPV infections and correlation to cervical cytology.

| <b>Cytology</b>                | <b>Any vaginal HR-HPV; n (%)</b> | <b>Any cervical HR-HPV; n (%)</b> | <b>Any cervical/vaginal HR-HPV; n (%)</b> | <b>Vaginal and cervical HR-HPV negative; n (%)</b> |
|--------------------------------|----------------------------------|-----------------------------------|-------------------------------------------|----------------------------------------------------|
| <b>NILM</b>                    | 12 (57.1)                        | 8 (66.7)                          | 14 (60.9)                                 | 17 (63.0)                                          |
| <b>ASCUS</b>                   | 3 (14.3)                         | 2 (16.7)                          | 3 (13.0)                                  | 1 (3.7)                                            |
| <b>ASC-H</b>                   | 2 (9.5)                          | 1 (8.3)                           | 2 (8.7)                                   | 1 (3.7)                                            |
| <b>LSIL</b>                    | 2 (9.5)                          | 1 (8.3)                           | 2 (8.7)                                   | 3 (11.1)                                           |
| <b>HSIL</b>                    | 1 (4.8)                          | 0 (0)                             | 1 (4.3)                                   | 0 (0)                                              |
| <b>Squamous cell carcinoma</b> | 0 (0)                            | 0 (0)                             | 0 (0)                                     | 0 (0)                                              |
| <b>No data</b>                 | 1 (4.8)                          | 0 (0)                             | 1 (4.3)                                   | 5 (18.5)                                           |

**Table S4.** Type-specific HR-HPV concordance in any mucous membrane in couples.

|                             | <b>Female negative</b> | <b>Female positive</b> | <b>P=0.004</b> |
|-----------------------------|------------------------|------------------------|----------------|
| <b>Male negative; n (%)</b> | 18 (42.9)              | 24 (57.1)              |                |
| <b>Male positive; n (%)</b> | 21 (77.8)              | 6 (22.2)               |                |
